# Supplementary material for: A pentatricopeptide repeat protein restores nap cytoplasmic male sterility in Brassica napus
Source: PubMed Central journal article supplement (PMC5853434; doi:10.1093/jxb/erx239), 2017-07-20
Supplement: erx239_supplementary_figures_s1_s5_table_s1_s2.pdf [file erx239_supplementary_figures_s1_s5_table_s1_s2.pdf]

## Supplementary data

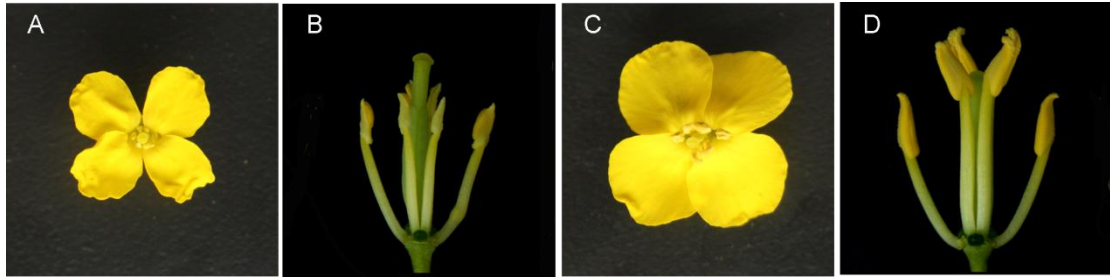

**Supplementary Fig. S1.** Opening flower morphology of the parent plants 181A and H5 under relatively low temperature. A, the whole flowers of sterile parent 181A; B, the sterile flower with petals and sepals peeled off; C, the whole flowers of fertile parent H5; D, the fertile flower with petals and sepals peeled off. The petals of sterile parent are shrunk (A) and the stamens of sterile parent are shorter than pistil (B).



1 atgttggtgctcggagattgggtgcttctgctctcgtatccccctgagtcctggtgactcttgcaactccttctctcttttcatcagatcc  
M L C R R L V L V S R I P L S P V G T L A T P L L S F I R S  
91 tcatgcaaacgaggctactctggtctcggcagcgatagaaatctctcatcttacaagagagactgagaagtggctggtcgatatacaag  
S C E R G Y S G L G S D R N L S S Y K E R L R S G L V D I K  
181 aagaaggatgctgtagctctggttccagtccatgattagggtctcctcttccacggtcattggatttcaataaactggttagtgagta  
K K D A V A L F Q S M I R S R P L P T V M D F N K L F S A V  
271 gccagaacgaaacagatgatctcgtggtggtctctgcaagcaaatggaactgcaagggtgacacatagcatttacacgctgagatt  
A R T K Q Y D L V L D L C K Q M E L Q G I A H S I Y T L S I  
361 atgatcaattgcttctgcccctctgagggaactcggtttctggttttctggtgagggtaagatggtgaggcttgggtgatgagcctgacaca  
M I N C F C R L R E L G F A F S V M G K M L R L G Y E P D T  
451 atcacattotcaacttggatcaacggttttagtctggtggtgtagagtttccgaaagctggtgagtttagttgatcgtatggtggaaatggag  
I T F S T L I N G L C L V G R V S E A V E L V D R M V E M E  
541 gttatacacaatctcatcagctcaacactattgtcaatggacttctctccaagtggaagtgtctgaggcaatggctttgatcagatcga  
V I P N L I T L N T I V N G L C L Q G E V S E A M A L I D R  
631 atgattggataatggatgccaaaccaatgaaactgatctatggtccggtttgaacagaatggtcaagtcaggtaaacactgcctggccttg  
M M D N G C Q P N E R T Y G P V L N R M C K S G N T A L A L  
721 gatctgctcagaagatggaacacagaagatcaagctcagatgacacatacaatctcatcattgacagctctttgcaaatgaggggagc  
D L L R K M E H R K I K L D A V T Y N F I I D S L C K D G S  
811 ctgcaagatgactcagccttttcaatgaaatggaaaccaaaggatcaaaaacaaatgtctttacctacaactctctcattagaggcttc  
L E D A L S L F N E M E T K G I K P N V F T Y N S L I R G F  
901 ttagtgctcagaagatgggatgattggtgcacagctgctgagggatatgatcacaaggggaatcacccccacccgtcatcactttcaattct  
C S A G R W D D G A P L L R D M I T R G I T P T V I T F N S  
991 ttgattgatgttttggaaagtggaaagcttactgaggctcaagatttgtacaacgagatgatcacaagggcacaatctctgatatc  
L I D S F V K V G K L T E A Q D L Y N E M I T R G T Y P D I  
1081 attacataaactctatgataaatggctgtgcaatgaaaaacgcttagatgagccaaccagatgctggatctgatggttagcaaggaa  
I T Y N S M I N G L C N E K R L D E A N Q M L D L M V S K E  
1171 tgcgctcctgatctcgtgacttataatacccttataaatggatactgtaaggctaaacgagttgatgaaggatgagacatttccgcaaa  
C D P N I V T Y N T L I N G Y C K A K R V D E G M R H F R K  
1261 atgtctgtcaaggagtggtgccaatacagctcattataacactctccaaggggtttgtcaatcaggaaaacttaattggtgcacaa  
M S V K G V V A N T V T Y N T L I Q G F C Q S G K L N V A K  
1351 gaactcttcaggagatggtctcctcaagggttcatcctgatattataacctacaaaatttctggtgagattgtgtgacaatggaaga  
E L F Q E M V S Q G V H P D I I T Y K I L L D G L C D N G E  
1441 gtagaaggaggttgggaataacttgatcaaatgcacaagagtaacatggaacttgatattggtttatataatcatcattcacgggatg  
V E E A L G I L D Q M H K S N M E L D I G L Y N I I I H G M  
1531 tgcaatgcaataaggtcagatgcttggagttgttctgtagcctacggtcgaaggagtgaaaccagacgctcaagacatatactaca  
C N A N K V D D A W S L F C S L R S K G V K P D V K T Y T T  
1621 atgattggaggttgtgtaagaaggatcgctgtctggaagcggcagatttataagaagatggaagaggtgggttggcacaatgat  
M I G G L C K K G S L S E A G M L C K K M E E D G I A P N D  
1711 tgtacatacaaacactcttatcaggggacatctccgagatggtgacttaacaaaatcagcaaaacttcaagaagaatgaagaggtgtggg  
C T Y N T L I R A H L R D G D L T K S A K L I E E M K R C G  
1801 ttctctgcagatgcttcaaccataaagattggtatggtatcggatggtagaatgaagaaaagctttctggatgctttcttag  
F S A D A S T I K I V M D M L S D G R M K K S F L D M L S \*

**Supplementary Fig. S3.** Nucleotide sequence of recessive *rfn* allele from 181A and the deduced amino acids. The mutations are indicated by red.



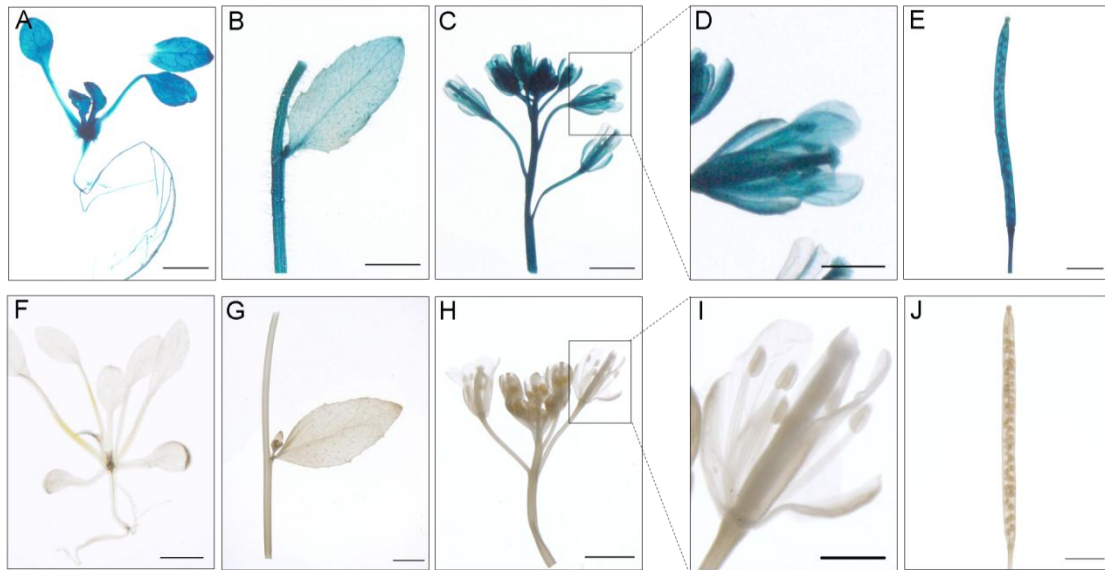

**Supplementary Fig. S5.** GUS assay from different tissues of *Pro<sub>Rfm</sub>*: GUS introduced *Arabidopsis* plants. A, seedling after two weeks screened by hygromycin; B-F, staining of the stem and leaf (B), inflorescence (C), flower (D) and silique (E) from reproductive stage. F-J, staining of the corresponding tissues from wild-type plants. Scale bars: A-C, E-H, J, 2 mm; D, I, 500  $\mu$ m.

**Supplementary Table S1.** The primers used in this study. Underlines indicate the restriction sites.

| <b>Prime name</b> | <b>Primer sequence (5'-3')</b>               | <b>Purpose</b>                      |
|-------------------|----------------------------------------------|-------------------------------------|
| BnSR02-F          | CTCTTCTACGGTCAGTGGCA                         | Fine mapping                        |
| BnSR02-R          | GAGATTGAGGATTGGGGTTG                         |                                     |
| BnSR28-F          | TTTGAAAGAGCGGTTATGA                          | Fine mapping                        |
| BnSR28-R          | ACATGCTCGATCGTGCTTAT                         |                                     |
| BnSR33-F          | GCTTGGTATCGTTCTCCGTC                         | Fine mapping                        |
| BnSR33-R          | TCTGGCTTGTTACTCAAGCG                         |                                     |
| BrSC64-F          | CTGCTGCGAGTTACTTGAAGC                        | Fine mapping and BAC                |
| BrSC64-R          | AGGATTCTGCTTTTGTGGTTTC                       | screening                           |
| BrSC65-F          | ATAGCAGAAGCAGCATTGAAAG                       | Fine mapping and BAC                |
| BrSC65-R          | GCCTGGAGTGAVAAGAAGACG                        | screening                           |
| BrIP77-F          | TGACGTGAGGGCGATTCTTG                         | Fine mapping                        |
| BrIP77-R          | TAATGGACCAGGCGGTGATG                         |                                     |
| BrIP81-F          | TCGCTCCACCAACAATAAAC                         | Fine mapping                        |
| BrIP81-R          | TCAGTCCATGAGATCAAGACG                        |                                     |
| ORF2-F            | CG <u>gaattc</u> GTCCAACCACAATGGCTTTAAC      | Binary construct of <i>Rfn</i>      |
| ORF2-R            | CG <u>ggatcc</u> ATTGCTAAGGCGAATCCGGTTG      |                                     |
| Rfn-F             | GTTCTTGCTGTAAAGCGTTGT                        | Transgenic plants                   |
| Rfn-R             | GTTGCGTTTTTCATTGCTTGTC                       | detection                           |
| RfnRT-F           | CTTGCAGAGATCCAACACGAGAT                      | qRT-PCR of <i>Rfn</i> or <i>rfn</i> |
| RfnRT-R           | CAAAACCGAGTTTCTGGAGGC                        |                                     |
| Pro-F             | CC <u>taattaa</u> GTCCAACCACAATGGCTTTAAC     | GUS-fusion                          |
| Pro-R             | <u>Aggcgccc</u> TGTTTGTTTTTTTTTTCTTCAAATCTAC |                                     |
| Rfn-Xba-F         | GC <u>tctaga</u> ATGTTGTGTCGGAGATTGGT        | GFP-fusion                          |
| Rfn-Xba-R         | GC <u>tctaga</u> ATTTCTATCGCTGCCGAGAC        |                                     |
| insitu-F          | ATGTAAGAAAGGCTCGCTGC                         | RNA <i>in situ</i>                  |
| insitu-R          | TAAGTCACCACCTCTGAGATGAG                      | hybridization                       |

|           |                        |                   |
|-----------|------------------------|-------------------|
| orf222-F  | TGGTGGAAAAGATCGTACAAGT | RNA gel blot      |
| orf222-R  | AAGACCCGGAAGTGGTGATC   |                   |
| orf139-F  | CGATCCACAAACTGACGCAT   | RNA gel blot      |
| orf139-R  | TTGTGCCGAGTCAAATCTGC   |                   |
| BnActin-F | CCCTGGAATTGCTGACCGTA   | qRT-PCR (control) |
| BnActin-R | TGGAAAGTGCTGAGGGATGC   |                   |

---

**Supplementary Table S2.** Fertility of T<sub>1</sub> progeny derived from five independent T<sub>0</sub> transgenic plants by selfing and test-cross.

| <b>No.</b>         | <b>Source</b> | <b>Total<br/>plants</b> | <b>Fertile<br/>plants</b> | <b>Sterile<br/>plants</b> | <b>Expected<br/>ratio</b> | <b><math>\chi^2</math> value<br/><sup>a</sup></b> |
|--------------------|---------------|-------------------------|---------------------------|---------------------------|---------------------------|---------------------------------------------------|
| T <sub>1</sub> -04 | selfing       | 61                      | 47                        | 14                        | 3:1                       | 0.05                                              |
| T <sub>1</sub> -20 | selfing       | 96                      | 70                        | 26                        | 3:1                       | 0.13                                              |
| T <sub>1</sub> -21 | selfing       | 132                     | 125                       | 7                         | 15:1                      | 0.07                                              |
| T <sub>1</sub> -29 | selfing       | 122                     | 111                       | 11                        | 15:1                      | 1.16                                              |
| T <sub>1</sub> -46 | selfing       | 99                      | 91                        | 8                         | 15:1                      | 0.30                                              |
| T <sub>1</sub> -04 | test-cross    | 65                      | 32                        | 33                        | 1:1                       | 0                                                 |
| T <sub>1</sub> -20 | test-cross    | 88                      | 51                        | 37                        | 1:1                       | 1.92                                              |
| T <sub>1</sub> -21 | test-cross    | 82                      | 55                        | 27                        | 3:1                       | 2.34                                              |
| T <sub>1</sub> -29 | test-cross    | 78                      | 60                        | 18                        | 3:1                       | 0.07                                              |
| T <sub>1</sub> -46 | test-cross    | 84                      | 62                        | 22                        | 3:1                       | 0.02                                              |

<sup>a</sup> $\chi^2$  (0.05, 1) = 3.84
